# Supplementary material for: A New Calmodulin-Binding Protein Expresses in the Context of Secondary Cell Wall Biosynthesis and Impacts Biomass Properties in Populus
Source: PubMed Central journal article supplement (PMC6290091; doi:10.3389/fpls.2018.01669), 2018-12-05
Supplement: Image_10.pdf [file Image_10.pdf]

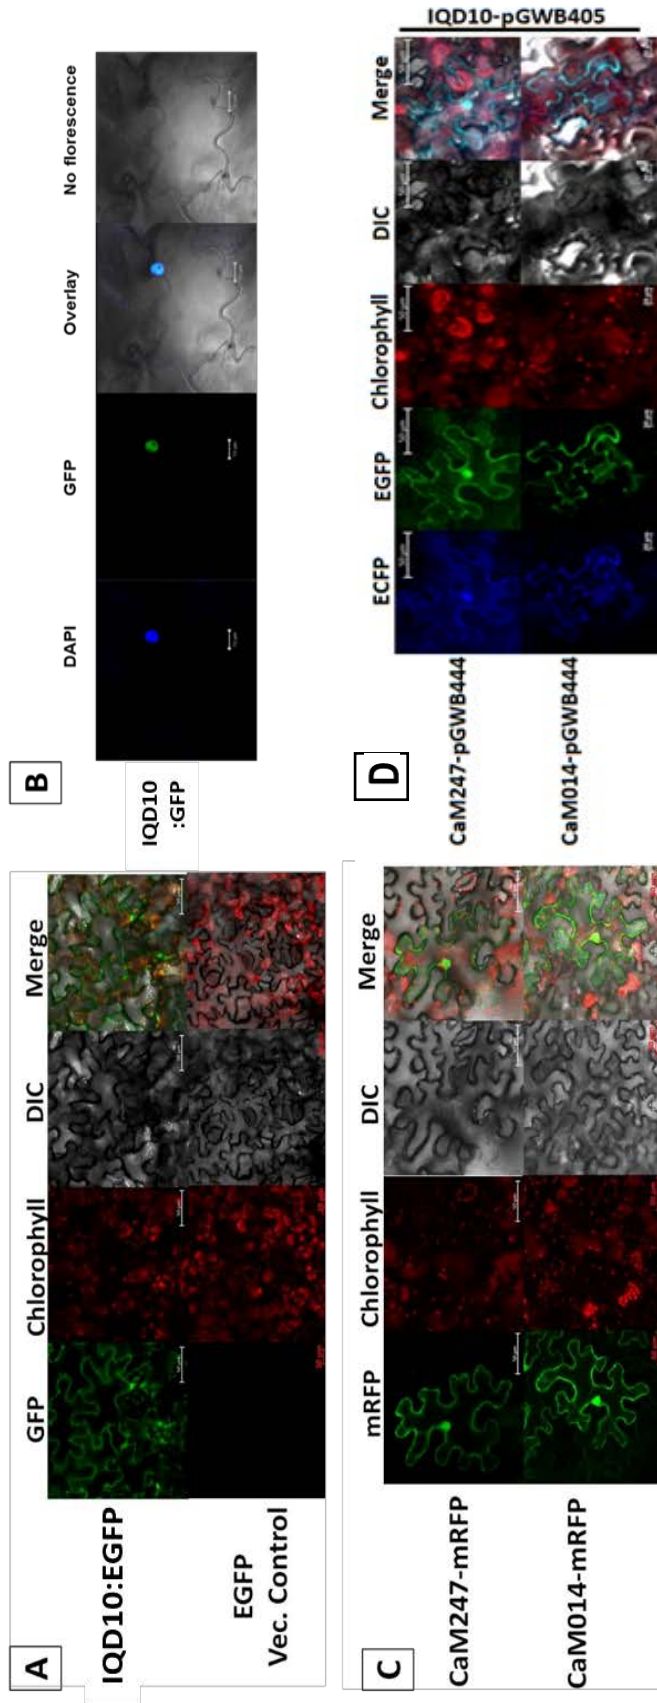

Supplemental Fig. 10. Original RGB subcellular localization image used to generate the accessible image in Fig. 4.

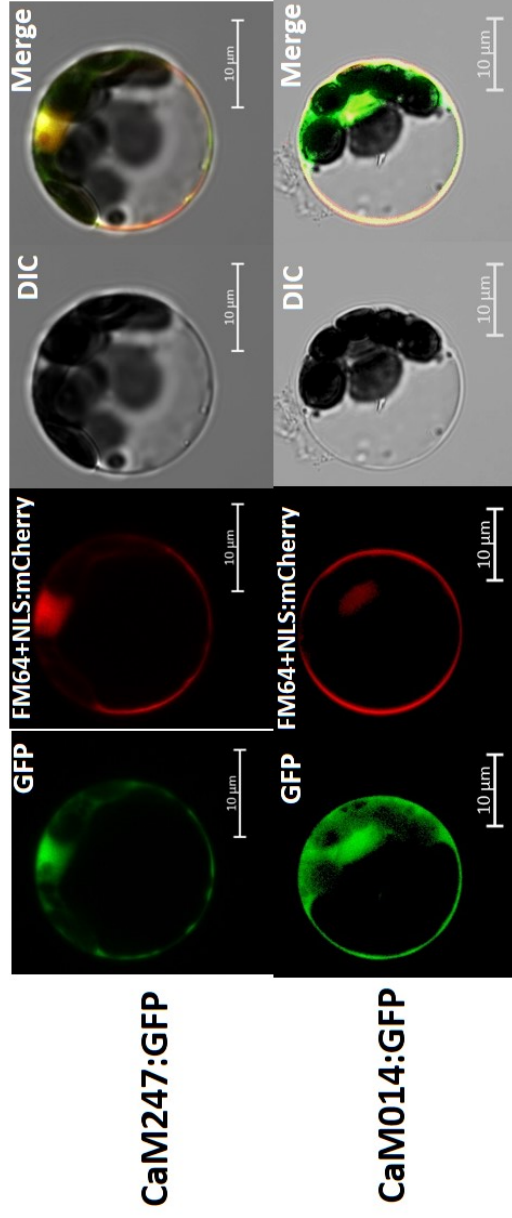

Supplemental Fig. 10. Original RGB subcellular localization image used to generate the accessible image in Supplemental Fig. 6.
